# Supplementary material
Source: PubMed Central journal article supplement (PMC4636486)
Supplement: NIHMS674843-supplement-Supplemental_Figures.pdf [file NIHMS674843-supplement-Supplemental_Figures.pdf]

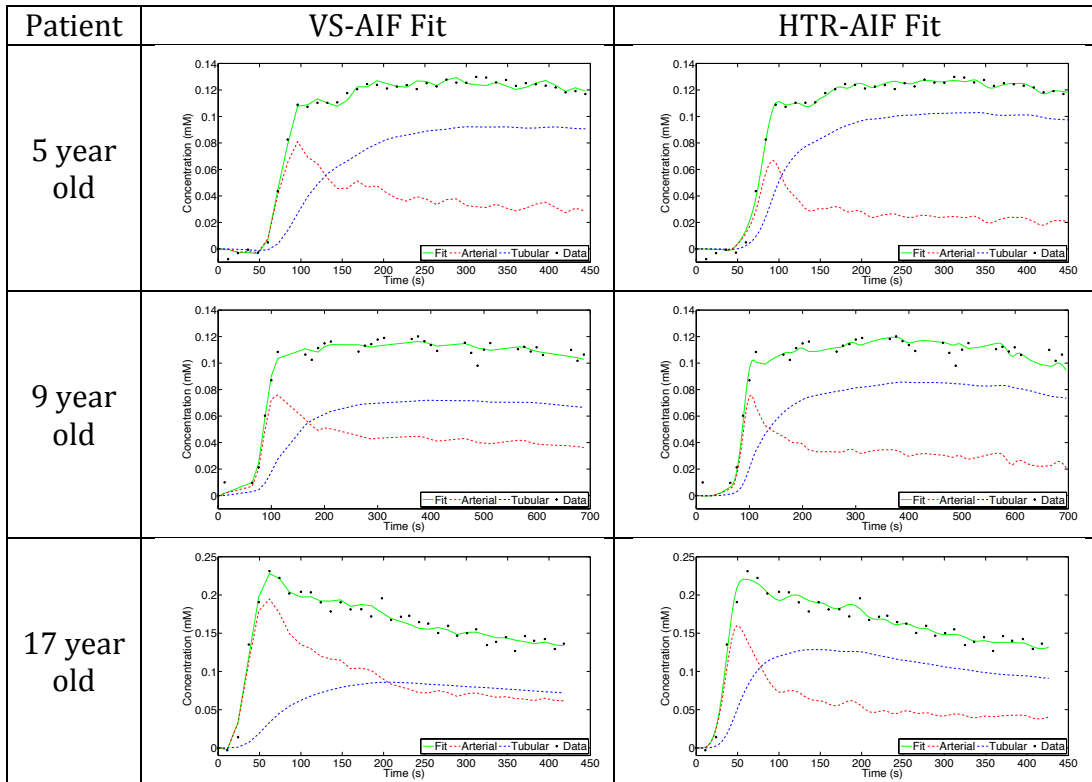

SUP. FIG. S1. The pharmacokinetic model fits are shown for the left kidneys of all 3 subjects. The omitted right kidney results look similar to the ones shown above. The black data points represent the concentration measurements in the cortex. The green curves are the fits calculated by the model. The red and blue dashed curves represent the arterial and tubular components of the fits respectively.

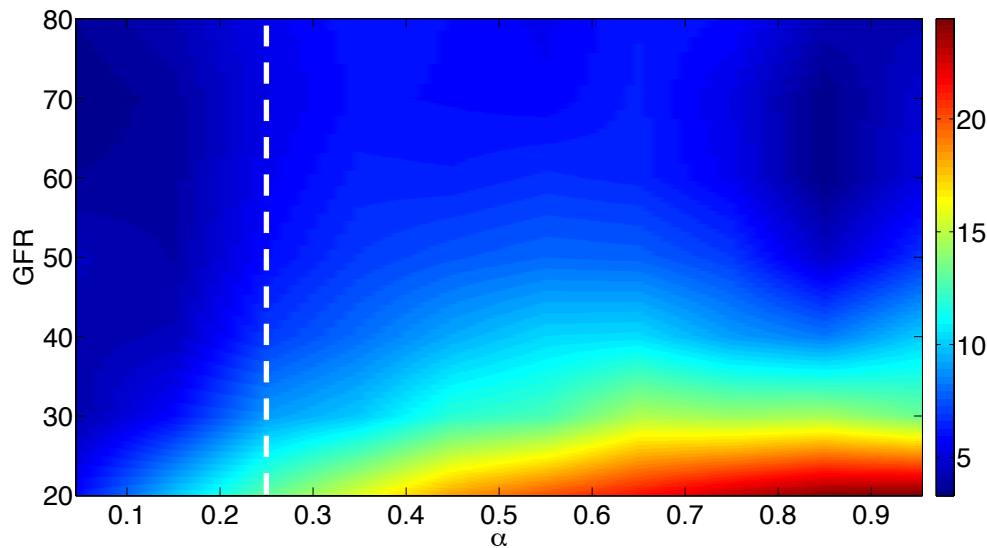

SUP. FIG. S2. The GFR estimation error (%) at different alpha and true GFR values. The dashed line shows the alpha value used in this study.
